# Supplementary material for: European sea bass genome and its variation provide insights into adaptation to euryhalinity and speciation
Source: PubMed Central journal article supplement — Nat Commun. 2014 Dec 23;5:5770. doi: 10.1038/ncomms6770 (PMC4284805; doi:10.1038/ncomms6770), 2014-12-23
Supplement: ncomms6770-s1.pdf [file ncomms6770-s1.pdf]

## Supplementary Figures

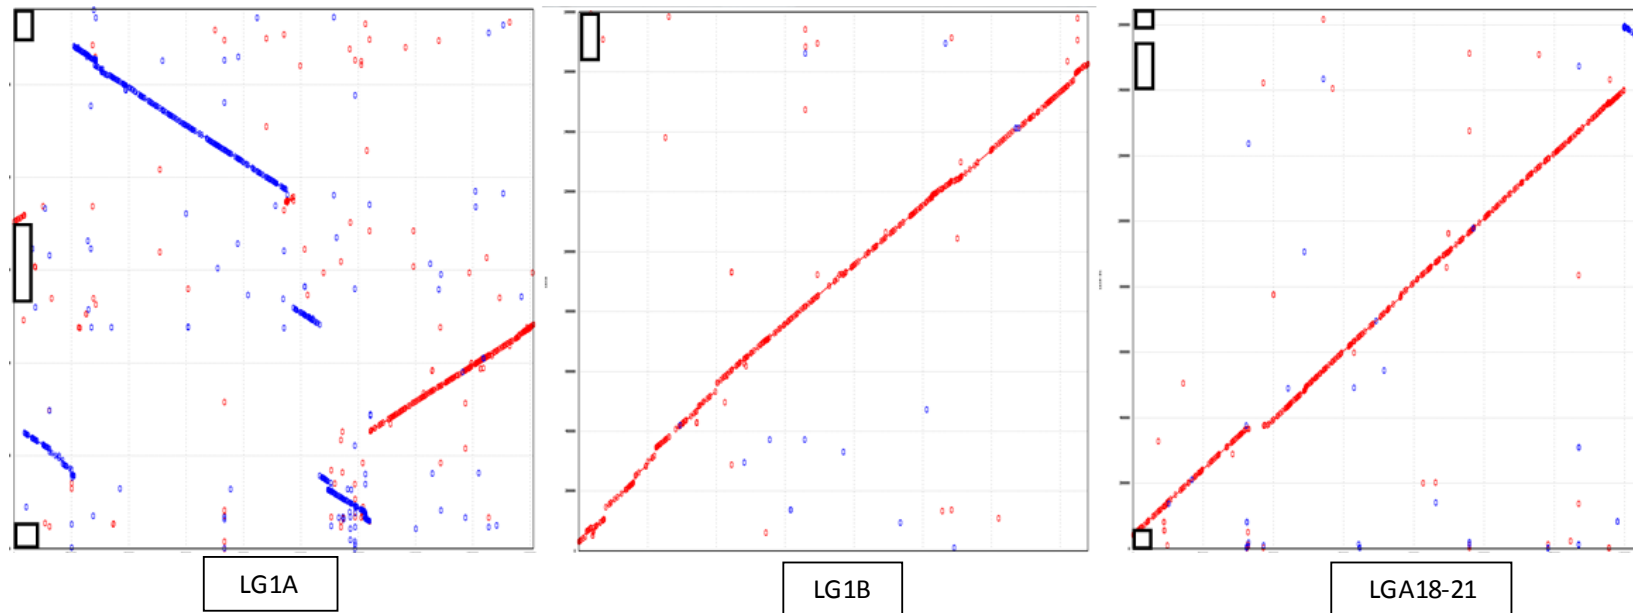

**Supplementary Figure 1:** Comparison of the new chromosomal sequences to the old version assembly of 3 chromosomes produced by the BAC mapping approach. By comparing the sequences from the BAC and the WGS approach for the three seabass chromosomes that have been sequenced by mapping BAC-ES to the *G. aculeatus* genome, we found that two of them have been similarly assembled between the BAC and the WGS approach (LG1B and LG18-21). Interestingly, all chromosomal groups assembled from the WGS data have more contig sequence assigned to the chromosome (rectangles at the chromosome vertical axis of the plots) in comparison to the BAC approach, which is due to the fact that gaps in the comparative BAC map resulted in sequencing gaps. For LG1A, the differences in long-range continuity between BAC and WGS strategy might be due to a long gap in the comparative BAC map in the middle of the chromosome that led to scaffolding problems. The missing sequence in this region maps to a megabase sized, unordered piece of the *G. aculeatus* genome named “scaffold\_27”. Therefore, BAC clones mapping to this region were not included in the chromosomal BAC pools.

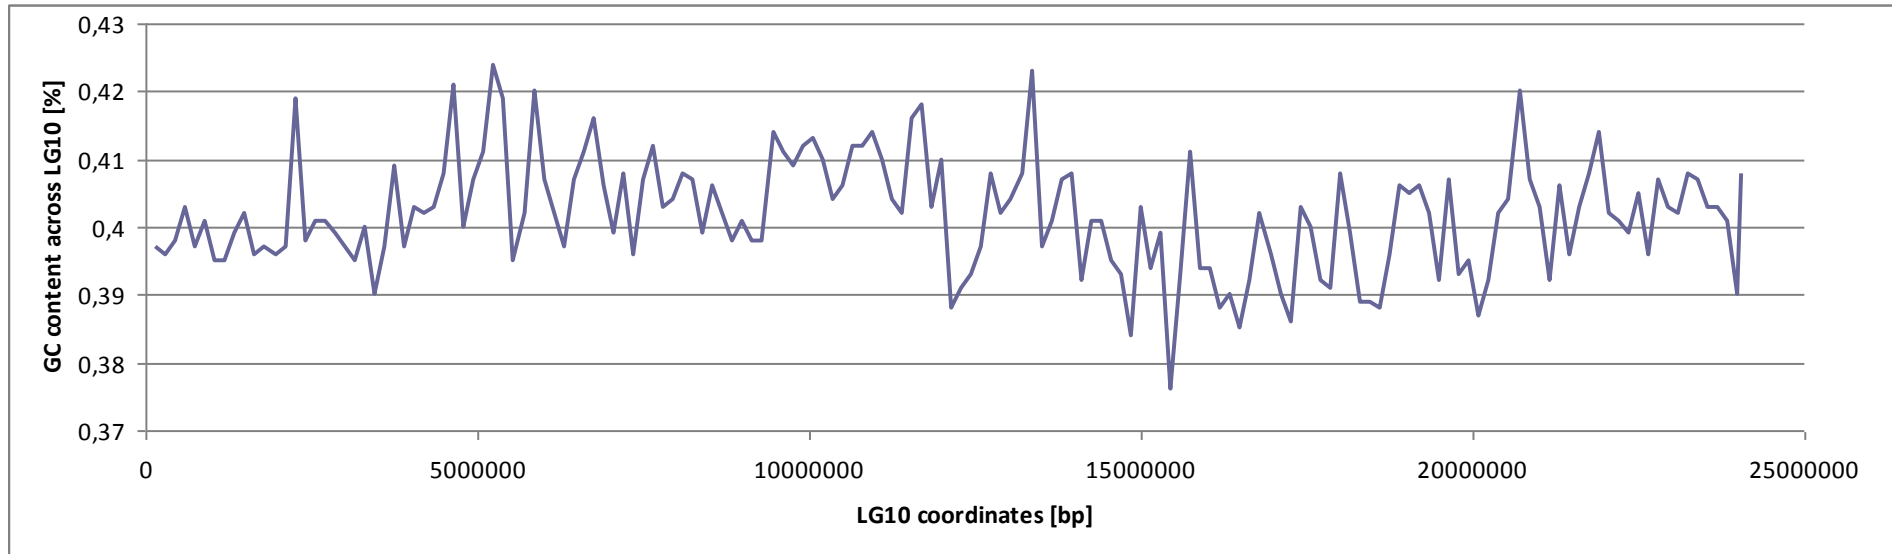

**Supplementary Figure 2:** Distribution of GC content along seabass chromosome 10. Similar unpatterned GC contents were found across all chromosomes (not shown).

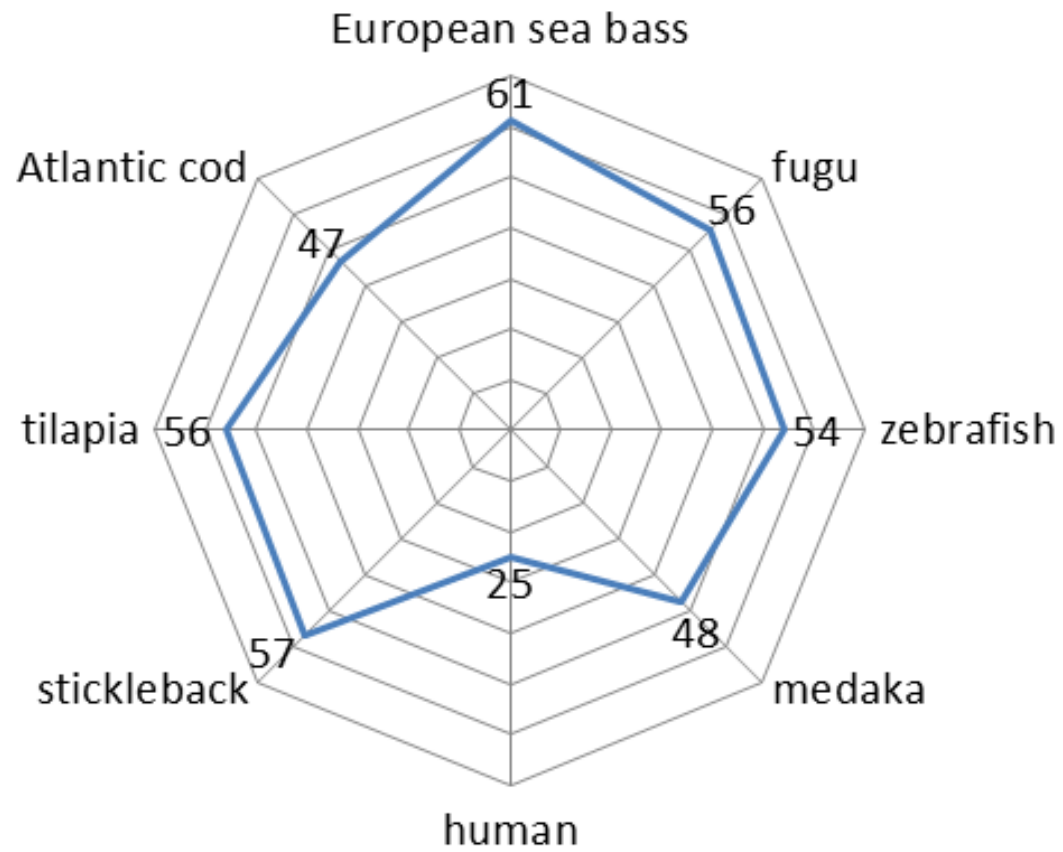

**Supplementary Figure 3:** Claudin genes numbers across several teleosts and human genomes.

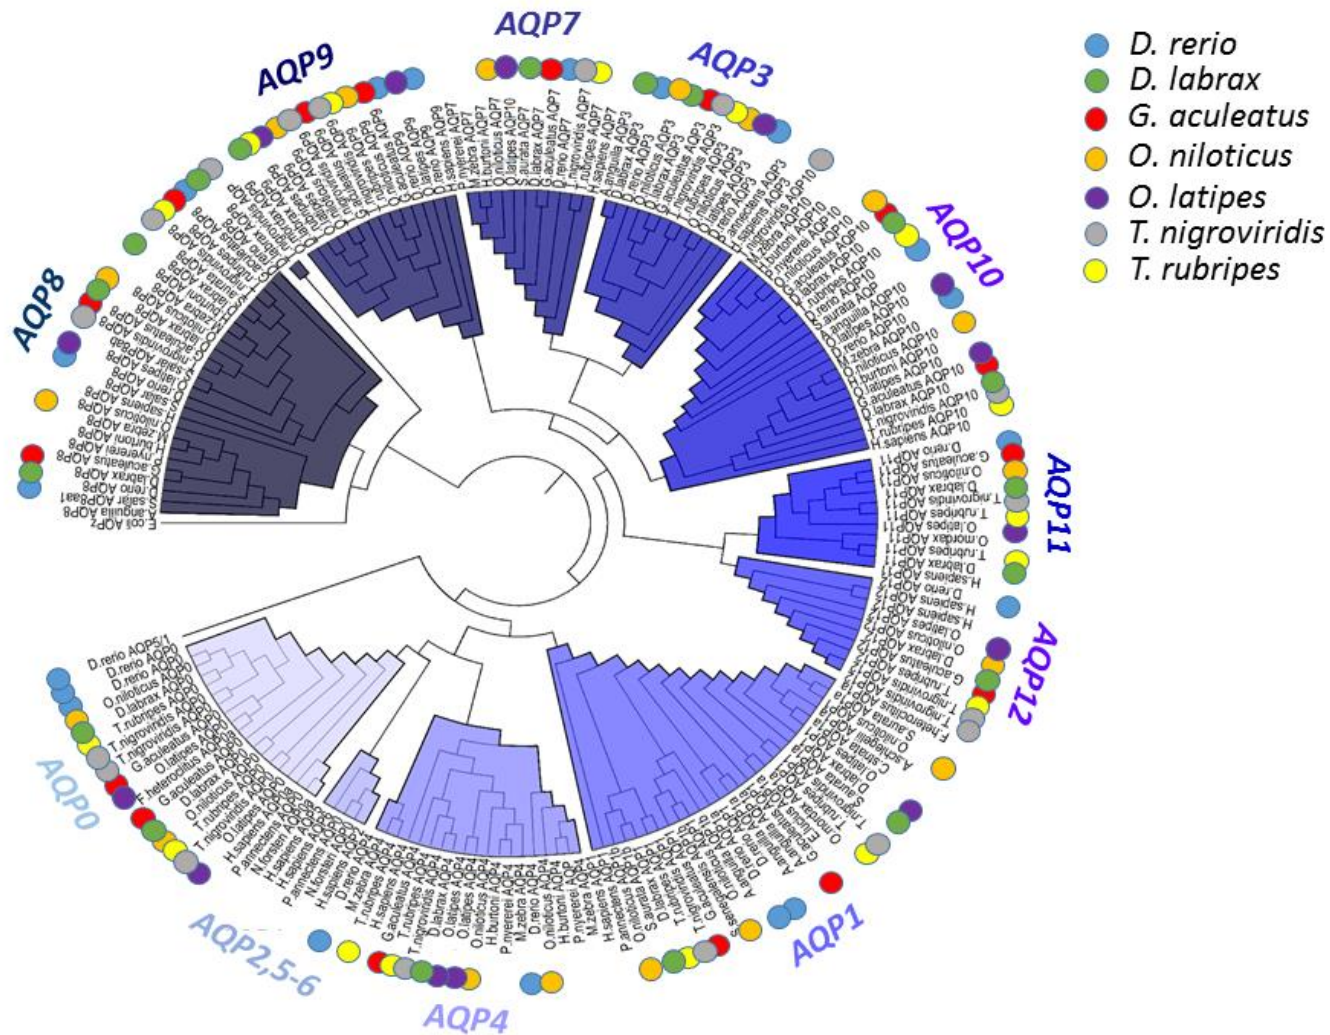

**Supplementary Figure 4:** Phylogeny of aquaporin gene family showing the number of duplicates found in the genomes of seabass and six other fully sequenced fish species.

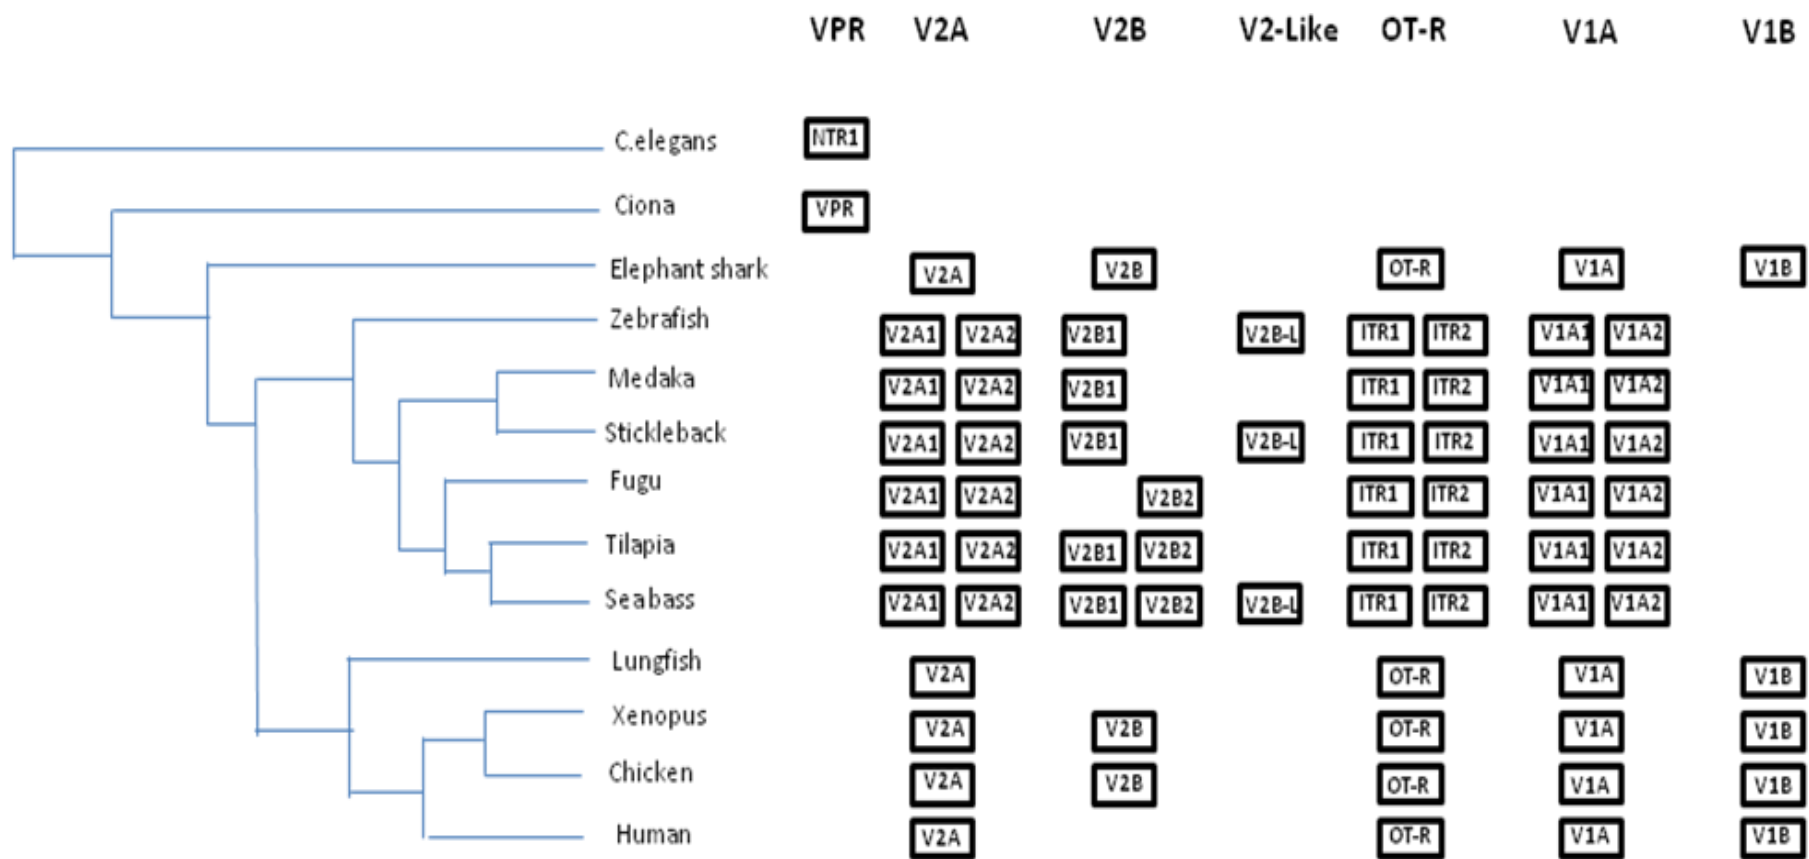

**Supplementary Figure 5: Model for vasopressin receptors gene duplications in Deuterostomes**

- *D. rerio*
- *D. labrax*
- *G. aculeatus*
- *O. niloticus*
- *O. latipes*
- *T. nigroviridis*
- *T. rubripes*

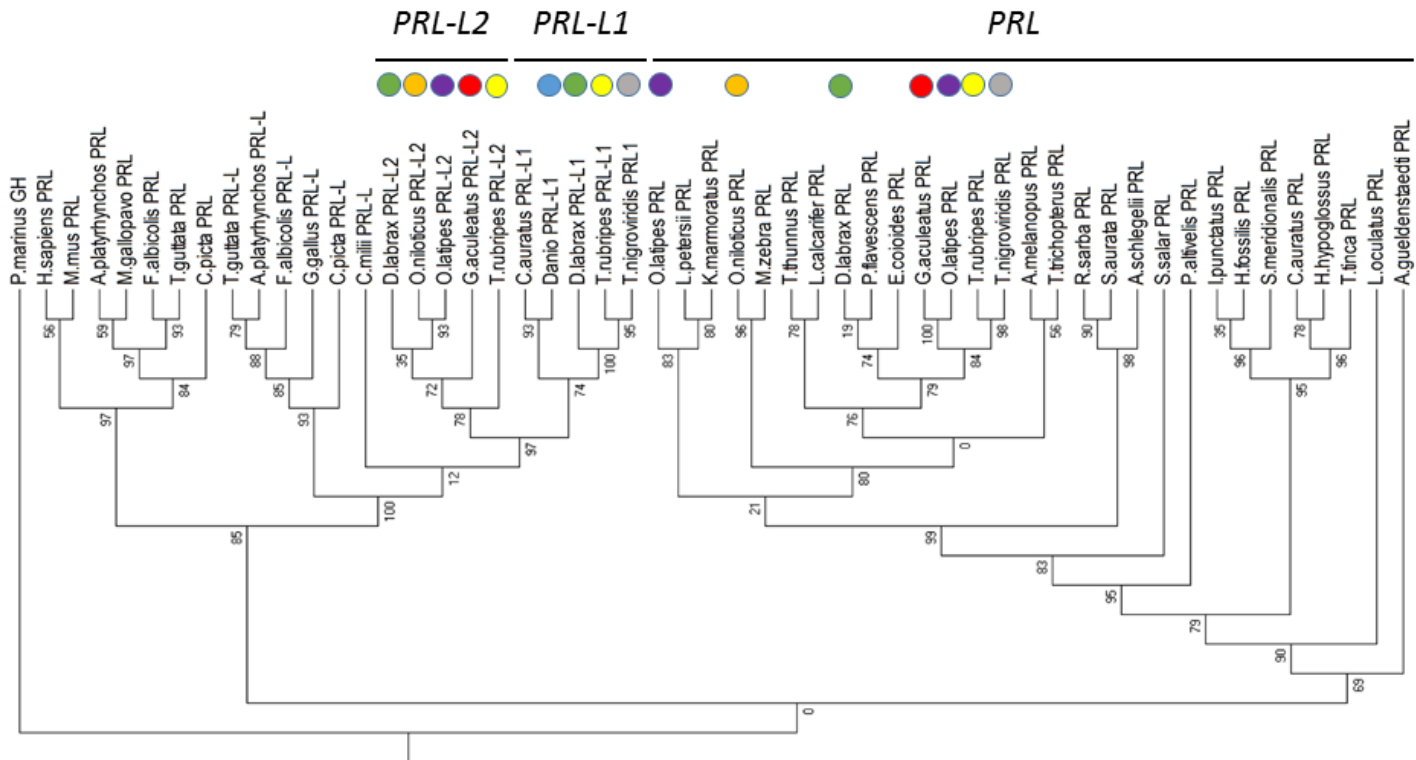

**Supplementary Figure 6:** Phylogeny of prolactin and prolactin-like genes in teleost fishes.

- *D. rerio*
- *D. labrax*
- *O. niloticus*
- *O. latipes*
- *T. rubripes*

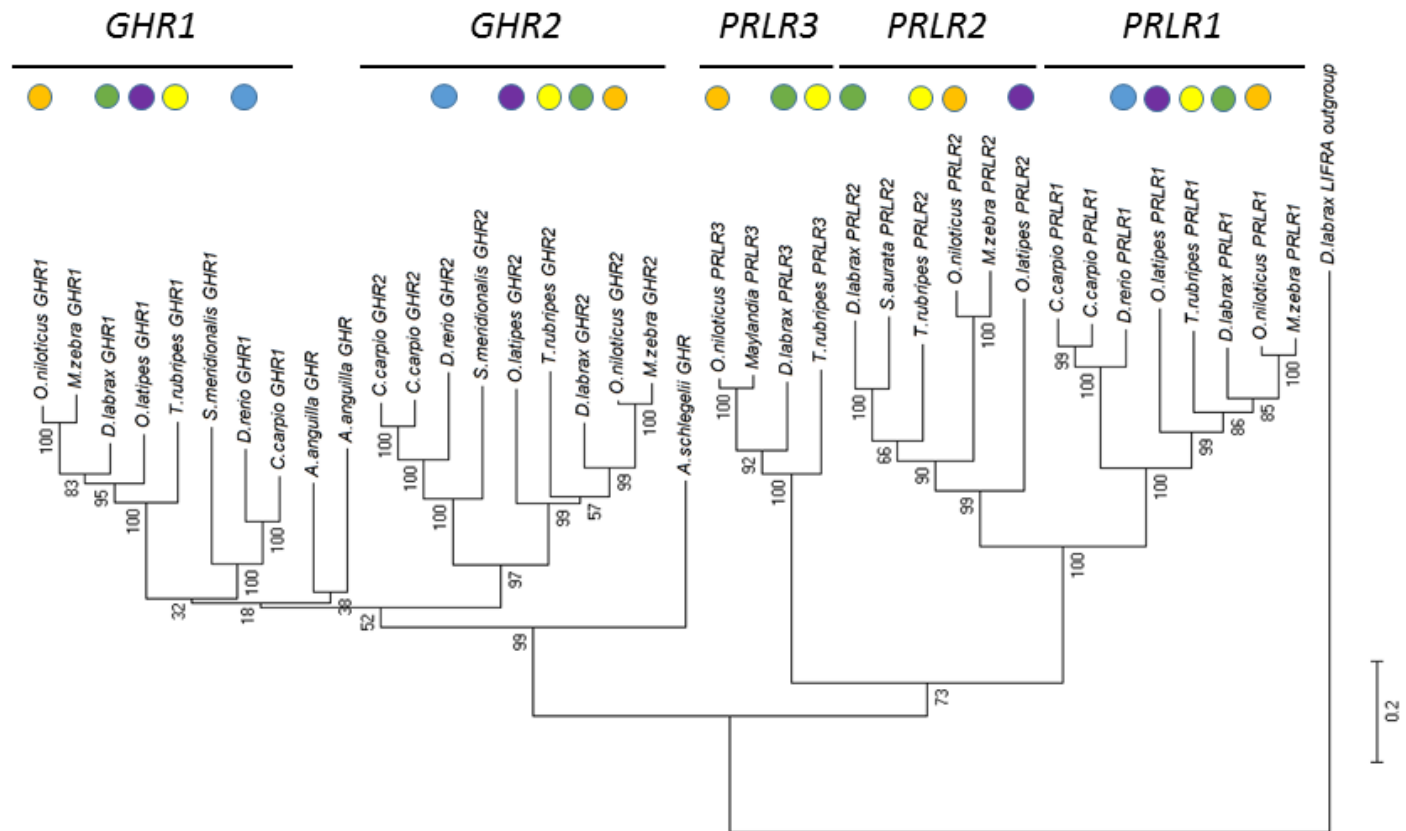

**Supplementary Figure 7:** Position of prolactin receptor-like genes (*PRLR*) in the other somatotropin receptors' phylogeny

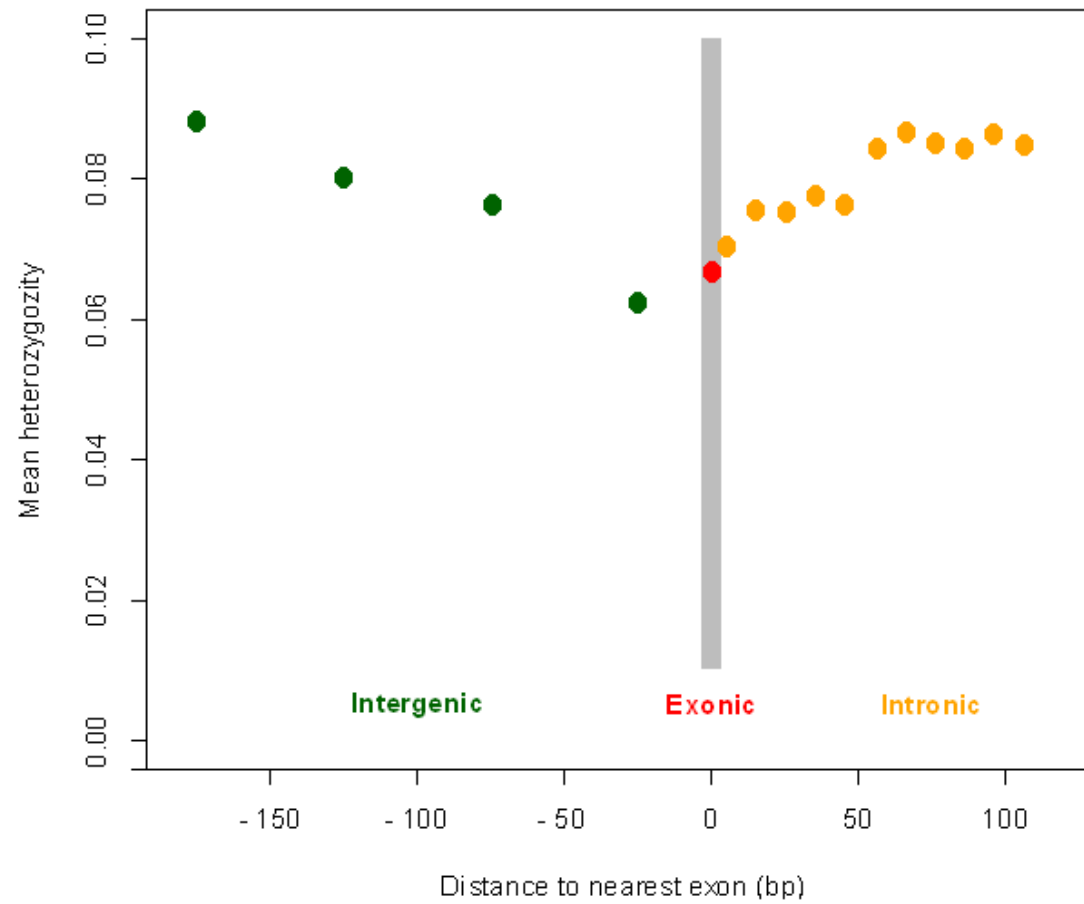

**Supplementary Figure 8:** Mean expected heterozygosity in seabass as a function of the physical distance to nearest exon.



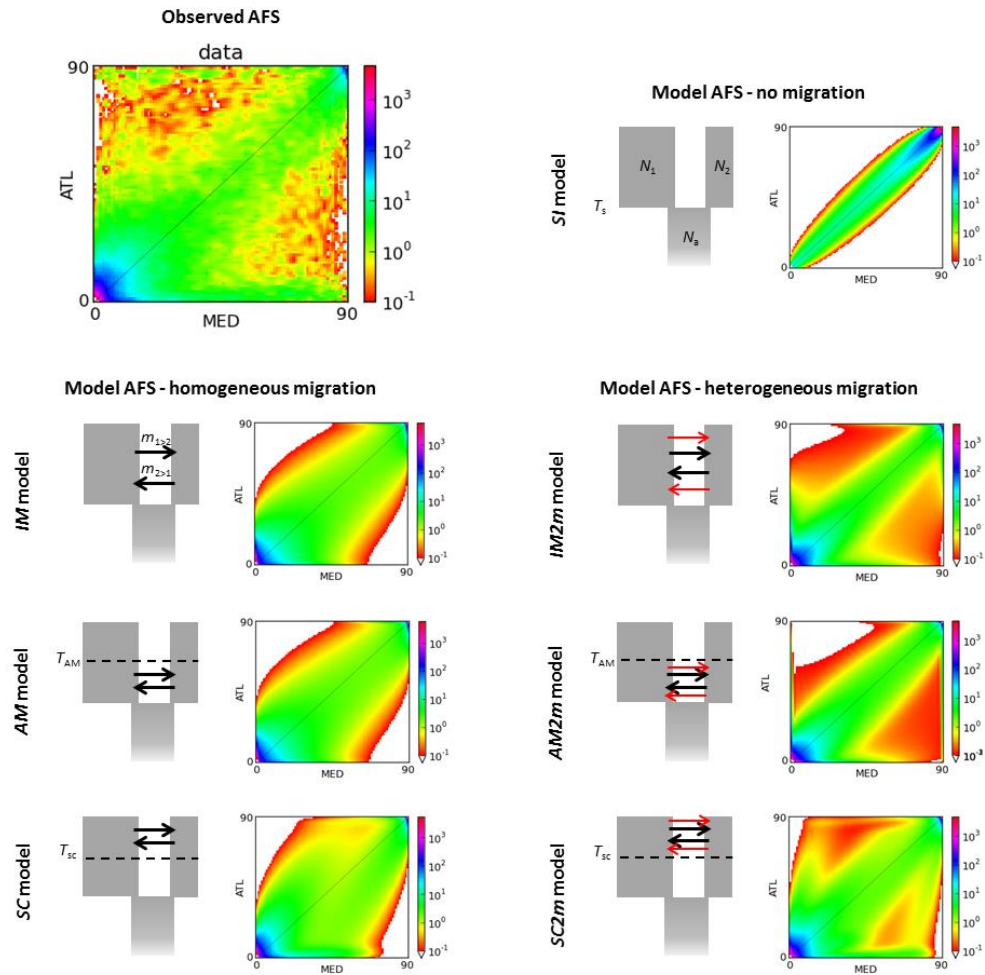

**Supplementary Figure 9: Results of model fitting for seven alternative models of divergence.** *SI* is the strict isolation model. *IM* is the Isolation-with-Migration model, *AM* the Ancient Migration model, and *SC* is the Secondary Contact model. All three models of divergence-with-gene-flow were implemented using one, shared migration rate in each direction ( $m_{1>2}$ ,  $m_{2>1}$ ) across the genome (homogeneous migration), or with two categories of migration rates in each direction across the genome (heterogeneous migration).

## Supplementary Tables

**Supplementary Table 1: Summary statistics of sequencing data**, detailed for each sequencing strategy.

| Technology                                              | <b>SANGER (ABI3730xl)</b> |                           | <b>ROCHE/454 pyrosequencing</b> |                                    | <b>Illumina GAIIx</b> |                    |                     |
|---------------------------------------------------------|---------------------------|---------------------------|---------------------------------|------------------------------------|-----------------------|--------------------|---------------------|
| Read type<br>(insert size)                              | PLASMID<br>(1-4 kbp)      | BAC ES<br>(100 - 200 kbp) | 454<br>SINGLE END               | 454<br>MATE-PAIRS<br>(10 - 30 kbp) | PE<br>(200-350 bp)    | PE<br>(400-600 bp) | PE<br>(800-1000 bp) |
| Read number                                             | 2,968,230                 | 102,690                   | 5,887,597                       | 1,008,190                          | 133,762,688           | 63,667,334         | 6,400,112           |
| Average length<br>(bp)                                  | 678                       | 669                       | 422                             | 183                                | 86                    | 99                 | 96                  |
| Total length<br>(bp)                                    | 2,011,428,197             | 68,701,876                | 2,483,714,938                   | 184,071,015                        | 11,483,791,419        | 6,283,880,364      | 614,423,708         |
| Approximate<br>coverage<br>(if genome<br>size is 763Mb) | 2.6                       | 0.1                       | 3.3                             | 0.2                                | 15.1                  | 8.2                | 0.8                 |

**Supplementary Table 2: Contigs and scaffolds summary statistics at different stages of the seabass genome assembly.**

|                                      | <b>CA6.1</b> | <b>Split scaffolds</b><br>(if no 20 kb mate pair coverage) | <b>BAMBUS scaffolder</b><br>(20 kb mates+BACends) | <b>Assembled chromosomal groups</b><br>(including information from RH map, linkage map and synteny) |
|--------------------------------------|--------------|------------------------------------------------------------|---------------------------------------------------|-----------------------------------------------------------------------------------------------------|
| Contig number                        | 48,076       | 46,509                                                     | 46,509                                            | 22,145                                                                                              |
| Contigs total length (bp)            | 686,341,209  | 670,105,629                                                | 670,105,629                                       | 575,169,980                                                                                         |
| Contig length average                | 14,276       | 14,408                                                     | 14,408                                            | 25,973                                                                                              |
| Largest Contig (bp)                  | 505,692      | 505,692                                                    | 505,692                                           | 505,692                                                                                             |
| N50 Contig length (bp)               | 53,106       | 53,190                                                     | 53,190                                            | 62,381                                                                                              |
| weak/degen contigs total length (bp) | 94,680,694   | 110,916,274                                                | 110,916,274                                       |                                                                                                     |
| Scaffold number                      | 18,496       | 18,902                                                     | 16,830                                            | 24                                                                                                  |
| Scaffolds total length (bp)          | 691,920,969  | 675,293,870                                                | 675,418,190                                       | 578,977,601                                                                                         |
| Scaffold length average (bp)         | 37,409       | 35,726                                                     | 40,132                                            | 24,124,067                                                                                          |
| Largest scaffold (bp)                | 4,747,568    | 4,744,412                                                  | 17,900,694                                        | 32,612,477                                                                                          |
| N50 Scaffold length (bp)             | 803,503      | 610,830                                                    | 5,087,423                                         | 26,215,200                                                                                          |

### Supplementary Table 3: Statistics of gene annotation in the seabass genome

| <b><u>Number of sequences:</u></b> | <b>Chromosomal sequences</b> | <b>Unordered sequences</b> | <b>All sequences</b> |
|------------------------------------|------------------------------|----------------------------|----------------------|
| <b>Genes</b>                       | 21,038                       | 5,681                      | 26,719               |
| Exons                              | 215,177                      | 27,906                     | 243,083              |
| Coding exons                       | 207,883                      | 26,736                     | 234,619              |
| Introns                            | 194,139                      | 22,225                     | 216,364              |
| 5-prime UTR > 9bp                  | 10,762                       | 1,676                      | 12,438               |
| 3-prime UTR > 9bp                  | 14,190                       | 2,426                      | 16,616               |
| Both UTRs > 9 bp                   | 10,266                       | 1,110                      | 11,376               |

| <b><u>Assembly coverage:</u></b> | <b>Chromosomal sequences</b> | <b>Unordered sequences</b> | <b>All sequences</b> | <b>Fraction of all sequences</b> | <b>Average size</b> |
|----------------------------------|------------------------------|----------------------------|----------------------|----------------------------------|---------------------|
| <b>Genes total (bp)</b>          | 316,349,781                  | 30,407,051                 | 346,756,832          | 51.30%                           | 12,978              |
| Coding exons total (bp)          | 35,644,056                   | 5,531,610                  | 41,175,666           | 6.09%                            | 169                 |
| Intron total (bp)                | 258,620,115                  | 22,737,198                 | 281,357,313          | 41.63%                           | 1,199               |
| 5-prime UTR                      | 4,155,321                    | 760,516                    | 4,915,837            | 0.73%                            | 395                 |
| 3-prime UTR                      | 20,898,758                   | 2,266,352                  | 23,165,110           | 3.43%                            | 1,394               |

| <b><u>Functional annotation:</u></b>                       | <b>Chromosomal sequences</b> | <b>Unordered sequences</b> | <b>All sequences</b> |
|------------------------------------------------------------|------------------------------|----------------------------|----------------------|
| Genes with description                                     | 20,170                       | 5,263                      | 25,433               |
| Genes with assigned symbol                                 | 18,279                       | 2,961                      | 21,240               |
| Genes without description, symbol and peptide larger 99 aa | 456                          | 410                        | 866                  |

**Supplementary Table 4: Summary of transcriptome sequences generated for gene annotation of the seabass genome.**

Four libraries constructed with 4 pools of 2 tissues from 14 individuals were generated, totalizing 19 Gb of sequences.

| <b>Tissue</b> (number of fish) | <b>Number of reads</b> (CASAVA) | <b>Cleaned read-pairs</b><br>( <i>Trimmomatic</i> ) | <b>Cleaned bases</b> | <b>Mapped reads</b><br>( <i>TopHat</i> ) |
|--------------------------------|---------------------------------|-----------------------------------------------------|----------------------|------------------------------------------|
| Liver (3)                      | 24,346,576                      | 24,322,906                                          | 4,843,728,650        | 40,135,177                               |
| Liver (3)                      | 23,032,898                      | 23,022,547                                          | 4,586,809,602        | 33,974,188                               |
| Intestine (4)                  | 25,630,146                      | 25,161,013                                          | 4,844,714,333        | 34,309,342                               |
| Intestine (4)                  | 24,250,509                      | 23,869,642                                          | 4,651,095,519        | 40,922,353                               |

**Supplementary Table 5: Annotation of the seabass mtDNA genome and similarity with the striped bass (*Morone saxatilis*)**

| Name                                      | Type       | Minimum | Maximum | Length | Direction | Similarity |
|-------------------------------------------|------------|---------|---------|--------|-----------|------------|
| tRNA-Phe                                  | tRNA       | 1       | 68      | 68     | forward   | 78.82%     |
| rRNA 12S                                  | rRNA       | 69      | 1026    | 958    | forward   | 88.18%     |
| rrnS gene                                 | gene       | 69      | 1026    | 958    | forward   | 88.18%     |
| tRNA-Val                                  | tRNA       | 1029    | 1100    | 72     | forward   | 87.50%     |
| rRNA 16S                                  | rRNA       | 1101    | 2800    | 17     | forward   | 85.33%     |
| rrnL gene                                 | gene       | 1101    | 2800    | 17     | forward   | 85.33%     |
| tRNA-Leu                                  | tRNA       | 2887    | 2960    | 74     | forward   | 80.54%     |
| ND1 gene                                  | gene       | 2961    | 3935    | 975    | forward   | 72.68%     |
| tRNA-Ile                                  | tRNA       | 3940    | 4009    | 70     | forward   | 84.57%     |
| tRNA-Gln                                  | tRNA       | 4009    | 4079    | 71     | reverse   | 87.32%     |
| tRNA-Met                                  | tRNA       | 4079    | 4149    | 71     | forward   | 92.39%     |
| ND2                                       | gene       | 4150    | 5194    | 1045   | forward   | 79.80%     |
| tRNA-Trp                                  | tRNA       | 5195    | 5267    | 73     | forward   | 72.88%     |
| tRNA-Ala                                  | tRNA       | 5269    | 5337    | 69     | reverse   | 73.91%     |
| tRNA-Asn                                  | tRNA       | 5339    | 5411    | 73     | reverse   | 85.21%     |
| L strand origin of replication rep origin | rep_origin | 5412    | 5444    | 33     | forward   | 73.53%     |
| tRNA-Cys                                  | tRNA       | 5445    | 5512    | 68     | reverse   | 70.88%     |
| tRNA-Tyr                                  | tRNA       | 5513    | 5582    | 70     | reverse   | 87.14%     |
| COX1 gene                                 | gene       | 5584    | 7134    | 1551   | forward   | 73.44%     |
| tRNA-Ser                                  | tRNA       | 7135    | 7205    | 71     | reverse   | 64.51%     |
| tRNA-Asp                                  | tRNA       | 7222    | 7292    | 71     | forward   | 75%        |
| COX2 gene                                 | gene       | 7298    | 7988    | 691    | forward   | 70.82%     |
| tRNA-Lys                                  | tRNA       | 7989    | 8062    | 74     | forward   | 95.14%     |
| ATP8 gene                                 | gene       | 8067    | 8234    | 168    | forward   | 78.50%     |

|                                 |               |       |       |      |         |        |
|---------------------------------|---------------|-------|-------|------|---------|--------|
| ATP6 gene                       | gene          | 8225  | 8908  | 684  | forward | 78.60% |
| COX3 gene                       | gene          | 8908  | 9692  | 785  | forward | 73.86% |
| tRNA-Gly                        | tRNA          | 9693  | 9764  | 72   | forward | 85%    |
| ND3 gene                        | gene          | 9765  | 10113 | 349  | forward | 70.09% |
| tRNA-Arg                        | tRNA          | 10114 | 10182 | 69   | forward | 100%   |
| ND4L gene                       | gene          | 10183 | 10479 | 297  | forward | 70.30% |
| ND4 gene                        | gene          | 10473 | 11853 | 1381 | forward | 67.96% |
| tRNA-His                        | tRNA          | 11854 | 11922 | 69   | forward | 89.57% |
| tRNA-Ser                        | tRNA          | 11923 | 11991 | 69   | forward | 68.70% |
| tRNA-Leu                        | tRNA          | 11997 | 12069 | 73   | forward | 87.67% |
| ND5 gene                        | gene          | 12070 | 13911 | 1842 | forward | 64.82% |
| tRNA-Glu                        | tRNA          | 14272 | 14340 | 69   | reverse | 79.70% |
| CYTB gene                       | gene          | 14345 | 15485 | 1141 | forward | 70.18% |
| tRNA-Thr                        | tRNA          | 15486 | 15556 | 71   | forward | 94.93% |
| tRNA-Pro                        | tRNA          | 15556 | 15625 | 70   | reverse | 87.14% |
| control region D-loop           | D-loop        | 15626 | 17576 | 1950 | forward |        |
| ND6 gene                        | gene          | 17577 | 18095 | 519  | reverse | 80%    |
| Tandem repeat 17 pb             | repeat_region | 16112 | 16179 | 68   | forward |        |
| Tandem repeats 48 pb            | repeat_region | 16206 | 16637 | 432  | forward |        |
| Tandem repeats 48 pb (variants) | repeat_region | 16638 | 16733 | 96   | forward |        |
| Tandem repeat 48 pb             | repeat_unit   | 16734 | 16781 | 48   | forward |        |
| Tandem repeats 48 pb (variants) | repeat_region | 16782 | 16973 | 192  | forward |        |
| Control region (D-loop)         | D-loop        | 18096 | 18253 | 157  | forward |        |

**Supplementary Table 6: Summary statistics of the different types of repetitive elements in the seabass genome.**

| <b>Type of repeats</b> | <b>All sequences</b> |        | <b>Sequence assigned to chromosomes</b> |        | <b>Unordered sequences</b> |        |
|------------------------|----------------------|--------|-----------------------------------------|--------|----------------------------|--------|
| Sine                   | 4044377              | 0.60%  | 2770467                                 | 0.48%  | 1273910                    | 1.31%  |
| Line                   | 17859437             | 2.64%  | 9251430                                 | 1.60%  | 8608007                    | 8.88%  |
| LTR                    | 4254880              | 0.63%  | 1539066                                 | 0.27%  | 2715814                    | 2.80%  |
| DNA                    | 28341507             | 4.19%  | 21802767                                | 3.77%  | 6538740                    | 6.75%  |
| Simple                 | 12257952             | 1.81%  | 9426978                                 | 1.63%  | 2830974                    | 2.92%  |
| low complexity         | 5635934              | 0.83%  | 4742868                                 | 0.82%  | 893066                     | 0.92%  |
| Satellite              | 3309911              | 0.49%  | 1535002                                 | 0.27%  | 1774909                    | 1.83%  |
| RNA                    | 1419305              | 0.21%  | 84397                                   | 0.01%  | 1334908                    | 1.38%  |
| Other                  | 1127250              | 0.17%  | 566955                                  | 0.10%  | 560295                     | 0.58%  |
| Unknown                | 66865035             | 9.89%  | 54683761                                | 9.44%  | 12181274                   | 12.57% |
| Total                  | 145115588            | 21.47% | 106403691                               | 18.38% | 38711897                   | 39.93% |



**Supplementary Table 7: Statistics for whole genome alignments of teleost species against the seabass genome assembly.**  
The species were ordered by similarity with seabass.

| <b>Aligned species</b>                            | <b><i>O. niloticus</i></b> | <b><i>G. aculeatus</i></b> | <b><i>T. rubripes</i></b> | <b><i>O. latipes</i></b> | <b><i>T. nigroviridis</i></b> | <b><i>G. morhua</i></b> | <b><i>D. rerio</i></b>  |
|---------------------------------------------------|----------------------------|----------------------------|---------------------------|--------------------------|-------------------------------|-------------------------|-------------------------|
| seabass sequence covered by colinear regions      | 579,237,436<br>(86.68%)    | 568,385,867<br>(85.05%)    | 524,324,456<br>(78.46%)   | 530,564,057<br>(79.39%)  | 510,465,800<br>(76.39%)       | 346,641,017<br>(51.87%) | 243,220,222<br>(36.40%) |
| largest colinear region                           | 4,682,506                  | 7,784,832                  | 3,739,309                 | 3,741,975                | 2,524,371                     | 2,265,684               | 664,057                 |
| N50 colinear region length                        | 886,981                    | 996,379                    | 589,013                   | 575,643                  | 495,766                       | 224,518                 | 89,075                  |
| seabass sequence covered by alignment blocks      | 171,342,748<br>(25.64%)    | 138,015,935<br>(20.65%)    | 84,121,215<br>(12.59%)    | 78,537,826<br>(11.75%)   | 73,418,610<br>(10.99%)        | 30,196,195<br>(4.52%)   | 18,886,208<br>(2.83%)   |
| largest alignment block                           | 17,527                     | 17,548                     | 17,114                    | 11,608                   | 11,552                        | 17,369                  | 17,113                  |
| N50 alignment block length                        | 453                        | 384                        | 288                       | 282                      | 275                           | 193                     | 178                     |
| average % nucleotide identity of alignment blocks | 79.07%                     | 78.64%                     | 78.88%                    | 78.30%                   | 78.73%                        | 78.44%                  | 76.46%                  |

**Supplementary Table 8: Total number of gene copies for the five expanded gene families which may have played a role in adaptation to euryhalinity. FW: freshwater, BW: brackish water, SW: sea water.**

|                         | <i>D. labrax</i> | <i>T. rubripes</i> | <i>T. nigroviridis</i> | <i>D. rerio</i>     | <i>O. latipes</i>   | <i>G. aculeatus</i>  | <i>O. niloticus</i>    | <i>G. morhua</i>    |
|-------------------------|------------------|--------------------|------------------------|---------------------|---------------------|----------------------|------------------------|---------------------|
| <i>claudin</i>          | 61               | 56                 | 51                     | 54                  | 48                  | 57                   | 56                     | 47                  |
| <i>aquaporin</i>        | 18               | 16                 | 18                     | 18                  | 14                  | 16                   | 18                     | 19                  |
| <i>OTX/AVT receptor</i> | 9                | 7                  | 5                      | 7                   | 8                   | 7                    | 8                      | 7                   |
| <i>PRL/PRL-like</i>     | 3                | 3                  | 2                      | 2                   | 3                   | 2                    | 2                      | 2                   |
| <i>PRLR</i>             | 3                | 3                  | 2                      | 2                   | 2                   | 3                    | 3                      | 2                   |
| <b>TOTAL</b>            | <b>94</b>        | <b>85</b>          | <b>78</b>              | <b>83</b>           | <b>75</b>           | <b>85</b>            | <b>87</b>              | <b>77</b>           |
| Habitat                 | SW/BW            | SW                 | FW/BW                  | FW                  | FW/BW               | FW/BW/SW             | FW/BW                  | SW                  |
| Halinity                | euryhaline       | stenohaline        | euryhaline             | stenohaline         | euryhaline          | euryhaline           | euryhaline             | stenohaline         |
| Salinity tolerance      | FW-SW            | BW (25% SW)<br>-SW | FW-SW                  | FW-BW (25‰)         | FW-SW               | FW-SW                | FW-SW                  | BW (9ppt)-SW        |
| References              |                  | Lee et al., 2005   | Lin et al., 2004       | Uliano et al., 2010 | Inoue & Takei, 2002 | Shimada et al., 2011 | Schofield et al., 2011 | Larsen et al., 2012 |

Lee, K. M., Kaneko, T. & Aida, K. (2005). Low-salinity tolerance of juvenile fugu *Takifugu rubripes*. *Fisheries Science* 71, 1324-1331.

Lin, C. H., Tsai, R. S. & Lee, T. H. (2004). Expression and distribution of Na, K-ATPase in gill and kidney of the spotted green pufferfish, *Tetraodon nigroviridis*, in response to salinity challenge.

*Comparative Biochemistry and Physiology Part A: Molecular & Integrative Physiology* 138, 287-295.

Uliano, E., Cataldi, M., Carella, F., Migliaccio, O., Iaccarino, D. & Agnisola, C. (2010). Effects of acute changes in salinity and temperature on routine metabolism and nitrogen excretion in gambusia (*Gambusia affinis*) and zebrafish (*Danio rerio*). *Comparative Biochemistry and Physiology Part A: Molecular & Integrative Physiology* 157, 283-290.

Inoue, K. & Takei, Y. (2002). Diverse Adaptability in *Oryzias* Species to High Environmental Salinity. *Zoological Science* 19, 727-734.

Shimada, Y., Shikano, T. & Merilä, J. (2011). A High Incidence of Selection on Physiologically Important Genes in the Three-Spined Stickleback, *Gasterosteus aculeatus*. *Molecular Biology and Evolution* 28, 181-193.

Schofield, P.J., Peterson, M.S., Lowe, M.R., Brown-Peterson, N.J. and Slack, W.T. (2011). Survival, growth and reproduction of non-indigenous Nile tilapia, *Oreochromis niloticus* (Linnaeus 1758). I. Physiological capabilities in various temperatures and salinities. *Marine and Freshwater Research* 62, 439-449.

Larsen, P. F., Nielsen, E. E., Meier, K., Olsvik, P. A., Hansen, M. M. & Loeschcke, V. (2012). Differences in Salinity Tolerance and Gene Expression Between Two Populations of Atlantic Cod (*Gadus morhua*) in Response to Salinity Stress. *Biochemical Genetics* 50, 454-466.

**Supplementary Table 9: Summary of tree branches exhibiting signatures of positive selection in gene-trees constructed for seabass aquaporin gene duplications.** In bold are evidenced branches involving seabass gene copies.

| Locus <sup>a</sup>          | Branch <sup>b</sup>        | Corrected p-value <sup>c</sup> | $\omega^{+d}$ | Pr [ $\omega=\omega^{+}$ ] <sup>e</sup> |
|-----------------------------|----------------------------|--------------------------------|---------------|-----------------------------------------|
| NM_001114910<br><i>AQP8</i> | <b>Node 93<sup>f</sup></b> | 0.001                          | 10000         | 0.14                                    |
| XM_003973563<br><i>AQP7</i> | <b>Node 23<sup>f</sup></b> | 0.011                          | 472.18        | 0.30                                    |

<sup>a</sup> Putative orthologous locus in zebrafish/takifugu and the corresponding protein

<sup>b</sup> Branch under episodic diversifying selection at  $p \leq 0.05$ .

<sup>c</sup> The p-value for episodic selection at this branch corrected for multiple testing using the Holm-Bonferroni method

<sup>d</sup> The  $\omega$  value inferred for positively selected sites long this branch.

<sup>e</sup> The proportion of sites inferred to be evolving at  $\omega^{+}$  along this branch

<sup>f</sup> Node 93 refers to the separation of seabass AQP8 (DLAGN\_00189570) and zebrafish AQP8 (NM\_001114910) genes; Node 23 refers to the separation of seabass AQP7 (DLAGN\_00090530) and zebrafish AQP7 (NM\_199910) genes.

**Supplementary Table 10: Summary of tree branches exhibiting signatures of positive selection in gene-trees constructed for seabass vasopressin receptors gene duplications. In bold are evidenced branches involving seabass gene copies.**

| <b>Locus<sup>a</sup></b>    | <b>Branch<sup>b</sup></b>   | <b>Corrected p-value<sup>c</sup></b> | <b><math>\omega^{+d}</math></b> | <b>Pr [<math>\omega=\omega^{+}</math>]<sup>e</sup></b> |
|-----------------------------|-----------------------------|--------------------------------------|---------------------------------|--------------------------------------------------------|
| NM_001301114<br>V1A2        | <b>Node 5<sup>f</sup></b>   | < 0.0001                             | 171.73                          | 0.12                                                   |
| NM_001297676<br>V1A1        | Node 6 <sup>f</sup>         | 0.017                                | 7.76                            | 0.18                                                   |
| NM_001297676<br>V1A1        | <b>Node 7<sup>f</sup></b>   | 0.001                                | 36.21                           | 0.13                                                   |
| XM_001922007<br>V2A1        | <b>Node 48<sup>f</sup></b>  | 0.000                                | 720.47                          | 0.20                                                   |
| XM_001922007<br>V2A1        | <b>Node 50<sup>f</sup></b>  | 0.017                                | 3333.85                         | 0.13                                                   |
| ENSDARP00000119491<br>V2B-L | <b>DLAGN_00207720_V2B-L</b> | 0.030                                | 482.81                          | 0.04                                                   |

<sup>a</sup> Putative orthologous locus in zebrafish and the corresponding protein

<sup>b</sup> Branch under episodic diversifying selection at  $p \leq 0.05$ .

<sup>c</sup> The p-value for episodic selection at this branch corrected for multiple testing using the Holm-Bonferroni method

<sup>d</sup> The  $\omega$  value inferred for positively selected sites long this branch.

<sup>e</sup> The proportion of sites inferred to be evolving at  $\omega^{+}$  along this branch

<sup>f</sup> Node 5 refers to the separation of seabass V1A2 (DLAGN\_00170900) and takifugu V1A2 (ENSTRUP00000041717) genes; Node 6 refers to the separation of zebrafish V1A1 (NM\_001297676) and other teleost V1A1 genes; Node 7 refers to the separation of seabass V1A1(DLAGN\_00209950) and takifugu (ENSTRUP00000014647) V1A1 genes; Node 48 refers to the separation of fish V2A2 genes and V2A1 genes; Node 50 refers to the separation of seabass V2A1 (DLAGN\_00125320) and takifugu V2A1 (ENSTRUP00000001533) genes.

**Supplementary Table 11: Summary of tree branches exhibiting signatures of positive selection in gene-trees constructed for seabass prolactin gene duplications.** In bold are evidenced branches involving seabass gene copies.

| <b>Locus<sup>a</sup></b>     | <b>Branch<sup>b</sup></b>         | <b>Corrected p-value<sup>c</sup></b> | <b><math>\omega^{+d}</math></b> | <b>Pr [<math>\omega=\omega^{+}</math>]<sup>e</sup></b> |
|------------------------------|-----------------------------------|--------------------------------------|---------------------------------|--------------------------------------------------------|
| NM_181437<br><i>PRL 1</i>    | <b><i>Node 10<sup>f</sup></i></b> | 0.019                                | 10000                           | 0.38                                                   |
| NM_001162854<br><i>PRL-L</i> | <b><i>Node 28<sup>f</sup></i></b> | 0.039                                | 1187.75                         | 0.12                                                   |

<sup>a</sup> Putative orthologous locus in zebrafish and the corresponding protein

<sup>b</sup> Branch under episodic diversifying selection at  $p \leq 0.05$ . Italicized putative duplicated genes in the seabass genome. Locus names are as in the seabass genome browser.

<sup>c</sup> The p-value for episodic selection at this branch corrected for multiple testing using the Holm-Bonferroni method

<sup>d</sup> The  $\omega$  value inferred for positively selected sites long this branch.

<sup>e</sup> The proportion of sites inferred to be evolving at  $\omega^{+}$  along this branch

<sup>f</sup> Node 10 refers to the separation of teleost fish PRL and the spotted gar PRL gene; Node 28 refers to the separation of seabass PRL-L2 (LG6) and takifugu rubripes PRL-L2 (XM\_003967630) novel gene duplicates.

**Supplementary Table 12: Summary of tree branches exhibiting signatures of positive selection in gene-trees constructed for seabass prolactin receptor gene duplications.** In bold are evidenced branches involving seabass gene copies.

| <b>Locus<sup>a</sup></b>     | <b>Branch<sup>b</sup></b>   | <b>Corrected p-value<sup>c</sup></b> | <b><math>\omega^{+d}</math></b> | <b>Pr [<math>\omega=\omega^{+}</math>]<sup>e</sup></b> |
|------------------------------|-----------------------------|--------------------------------------|---------------------------------|--------------------------------------------------------|
| XM_004074724<br><i>PRLR1</i> | <i>DLAGN_00083540_PRLR1</i> | < 0.0001                             | 10000.00                        | 0.05                                                   |
| XM_005459179<br><i>PRLR2</i> | <i>DLAGN_00121350_PRLR2</i> | < 0.0001                             | 174.45                          | 0.10                                                   |
| XM_005459179<br><i>PRLR2</i> | NM_001279622_TILAPIA_PRLR2  | < 0.0001                             | 23.01                           | 0.15                                                   |
| XM_003966644<br><i>PRLR3</i> | <b>Node 7<sup>f</sup></b>   | 0.012                                | 31.70                           | 0.09                                                   |
| XM_005459179<br><i>PRLR2</i> | <b>Node 13<sup>f</sup></b>  | 0.016                                | 7703.89                         | 0.08                                                   |
| XM_003966644<br><i>PRLR3</i> | DLAGN_00136380_PRLR3        | 0.020                                | 12.06                           | 0.10                                                   |

<sup>a</sup> Putative orthologous locus in zebrafish/medaka/takifugu and the corresponding protein

<sup>b</sup> Branch under episodic diversifying selection at  $p \leq 0.05$ . Italicized putative duplicated genes in the seabass genome. Locus names are as in the seabass genome browser.

<sup>c</sup> The p-value for episodic selection at this branch corrected for multiple testing using the Holm-Bonferroni method

<sup>d</sup> The  $\omega$  value inferred for positively selected sites long this branch.

<sup>e</sup> The proportion of sites inferred to be evolving at  $\omega^{+}$  along this branch

<sup>f</sup> Node 7 refers to the separation of seabass PRLR3 (DLAGN\_00136380) and Tilapia PRLR3 (XM\_005459179) genes; Node 13 refers to the separation of seabass PRLR2 (DLAGN\_00121350) and tilapia PRLR2 (NM\_001279622) genes.

**Supplementary Table 13: Summary of tree branches exhibiting signatures of positive selection in gene-trees constructed for seabass-specific recent duplications.** In bold are evidenced branches involving seabass gene copies.

| Locus <sup>a</sup>                     | Branch <sup>b</sup>              | Corrected p-value <sup>c</sup> | $\omega$ <sup>d</sup> | Pr [ $\omega=\omega^+$ ] <sup>e</sup> |
|----------------------------------------|----------------------------------|--------------------------------|-----------------------|---------------------------------------|
| ENSORLG00000006910<br>Unknown protein  | <b><i>DLAGN_00143800</i></b>     | 0.000                          | 408.77                | 0.04                                  |
| ENSORLG00000006910<br>Unknown protein  | ENSONIG00000009239               | 0.018                          | 3.49                  | 0.35                                  |
| ENSDARG00000016345<br><i>NCOA5</i>     | <b>Node 13<sup>f</sup></b>       | 0.001                          | 3540.31               | 0.02                                  |
| ENSDARG00000016345<br><i>NCOA5</i>     | <b><i>DLA_LG1A_007760</i></b>    | 0.039                          | 10000.00              | 0.01                                  |
| ENSORLG00000004029<br><i>ACP2</i>      | <b><i>DLA_LG24_002230</i></b>    | < 0.0001                       | 9999.43               | 0.05                                  |
| ENSDARG00000061672<br>si:ch73-334d15.1 | ENSGACG00000004476               | 0.015                          | 16.95                 | 0.02                                  |
| ENSDARG00000061672<br>si:ch73-334d15.1 | <b><i>DLAGN_00105480</i></b>     | 0.028                          | 20.16                 | 0.05                                  |
| ENSDART00000104504<br><i>fetuin B</i>  | <b><i>DLAGN_00145680_680</i></b> | < 0.0001                       | 136.43                | 0.07                                  |

<sup>a</sup> Putative orthologous locus in zebrafish/medaka and the corresponding protein

<sup>b</sup> Branch under episodic diversifying selection at  $p \leq 0.05$ . Italicized putative duplicated genes in the seabass genome. Locus names correspond to names in the seabass genome browser.

<sup>c</sup> The p-value for episodic selection at this branch corrected for multiple testing using the Holm-Bonferroni method

<sup>d</sup> The  $\omega$  value inferred for positively selected sites along this branch. To check for potential inflation of  $\omega$  values due to low numbers of synonymous substitutions, uncorrected percentages of synonymous substitutions were estimated in relevant pairwise sequence comparisons. Values ranged from 0.055 (5.5% uncorrected) to 0.125 (12.5%) between recent duplicates in seabass (absolute number of synonymous changes ranged between 12 and 30).

<sup>e</sup> The proportion of sites inferred to be evolving at  $\omega^+$  along this branch

<sup>f</sup> Node 13 refers to the origin of seabass duplicated genes at this locus (split LG1A\_007760/LG1A\_007750)

**Supplementary Table 14: Origin of the 103 samples of the seabass used for the RAD sequencing experiment.**

| Species             | Basin             | Country  | Location | Longitude | Latitude  | Date       | Sample size |
|---------------------|-------------------|----------|----------|-----------|-----------|------------|-------------|
| <i>D. labrax</i>    | Mediterranean Sea | France   | Mauguio  | 43.578899 | 4.028435  | 10/1/2011  | 25          |
| <i>D. labrax</i>    | Mediterranean Sea | France   | Palavas  | 43.516564 | 3.939257  | 9/25/2012  | 15          |
| <i>D. labrax</i>    | Mediterranean Sea | Algeria  | Annaba   | 36.930683 | 7.804985  | 7/1/2012   | 10          |
| <i>D. labrax</i>    | Atlantic Ocean    | Portugal | Mondego  | 40.139515 | -8.758678 | 11/28/2011 | 31          |
| <i>D. labrax</i>    | Atlantic Ocean    | France   | Biarritz | 43.501001 | -1.618137 | 6/18/2003  | 19          |
| <i>D. punctatus</i> | Mediterranean Sea | Tunisia  | El Biban | 33.25247  | 11.238899 | 2005       | 3           |



**Supplementary Table 15: Results of model fitting for seven alternative models of divergence.** *SI* is the strict isolation model. *IM* is the Isolation-with-Migration model, *AM* the Ancient Migration model, and *SC* is the Secondary Contact model. All three models of divergence-with-gene-flow were implemented using one, shared migration rate in each direction ( $m_{12}$ ,  $m_{21}$ ) across the genome (homogeneous migration), or with two categories of migration rates in each direction across the genome (heterogeneous migration).

| Model       | k  | MLE       | AIC      | $\Delta_i$ | $L(M_i y)$ | $w_i$ | Theta   | nu1     | nu2    | m12    | m21     | me12   | me21   | Ts     | Tps    | P      | O      |
|-------------|----|-----------|----------|------------|------------|-------|---------|---------|--------|--------|---------|--------|--------|--------|--------|--------|--------|
| <i>SI</i>   | 4  | -29993,2  | 59994,3  | 36674,9    | 0          | 0     | 9897    | 16,2760 | 0,4519 | -      | -       | -      | -      | 0,0624 | -      | -      | 0,9900 |
| <i>IM</i>   | 6  | -21070,9  | 42153,8  | 18834,4    | 0          | 0     | 5931,6  | 2,9108  | 0,3094 | 0,4490 | 8,4505  | -      | -      | 0,6916 | -      | -      | 0,9793 |
| <i>AM</i>   | 7  | -21071,10 | 42156,2  | 18836,8    | 0          | 0     | 5925,1  | 2,9107  | 0,3097 | 0,4491 | 8,4452  | -      | -      | 0,6943 | 0,0000 | -      | 0,9789 |
| <i>SC</i>   | 7  | -17012,4  | 34038,7  | 10719,3    | 0          | 0     | 6204,2  | 2,8178  | 0,2781 | 1,1983 | 16,8157 | -      | -      | 0,5180 | 0,0476 | -      | 0,9795 |
| <i>IM2M</i> | 9  | -15030,2  | 30031,5  | 6712,04    | 0          | 0     | 5555,9  | 2,6122  | 0,5031 | 3,2216 | 26,6674 | 0,2852 | 1,7767 | 0,8781 | -      | 0,6579 | 0,9779 |
| <i>AM2M</i> | 10 | -15210,2  | 30440,4  | 7121,03    | 0          | 0     | 5258,9  | 3,0583  | 0,4789 | 0,0000 | 29,7270 | 0,2365 | 2,0261 | 0,9427 | 0,0002 | 0,6502 | 0,9751 |
| <i>SC2M</i> | 10 | -11649,7  | 23319,41 | 0          | 1          | 1     | 6018,80 | 2,3569  | 0,472  | 9,0584 | 45,018  | 1,431  | 8,938  | 0,634  | 0,027  | 0,645  | 0,9770 |

**k** The number of free parameters in the model

**MLE** maximum likelihood estimate over 20 independent runs

**AIC** Akaike Information Criterion

**$\Delta_i$**  Difference in AIC between model *i* and the best model (*SC2M*)

**$L(M_i|y)$**  Relative likelihood of model *i* compared to the best model (*SC2M*)

**$w_i$**  Akaike weight of model *i* compared to the best model (*SC2M*)

**Theta** Theta parameter for the ancestral population before split ( $\theta = 4N_{ref}\mu$ ), with  $N_{ref}$  being the effective size of the ancestral population, and  $\mu$  the per-site mutation rate per generation.

**nu1** The effective size of the Atlantic lineage population

**nu2** The effective size of the Mediterranean lineage population

**m12** The neutral movement of genes from the Mediterranean to the Atlantic lineage in units of  $2N_{ref}m_{2>1}$  generations

**m21** The neutral movement of genes from the Atlantic to the Mediterranean lineage in units of  $2N_{ref}m_{1>2}$  generations

**me12** The effective migration rate of “genomic-island” genes from the Mediterranean to the Atlantic lineage

**me21** The effective migration rate of “genomic-island” genes from the Atlantic to the Mediterranean lineage

**Ts** The time of split in units of  $2N_{ref}$  generations

**Tps** The time of migration stop (*AM* model) or start (*SC* model) post-split in units of  $2N_{ref}$  generations

**P** The proportion of the genome experiencing reduced effective migration rate compared to freely exchanged genes

**O** The proportion of correctly orientated SNPs when inferring ancestral allelic states using *D. punctatus* as an outgroup species
